# Supplementary material for: Selective adsorption and photodegradation of residual norfloxacin in water using a mTiO2 based inorganic molecularly imprinted magnetic photocatalyst
Source: Royal Society of Chemistry journal article supplement (doi:10.1039/d4nj03014a), 2024-01-01
Supplement: d4nj03014a1.pdf [file d4nj03014a1.pdf]

**Selective adsorption and photodegradation of residual norfloxacin in water by  
mTiO<sub>2</sub> based inorganic molecularly imprinted magnetic photocatalyst**

Li Zheng <sup>b,c</sup>; Wenlong Liao <sup>a,b\*</sup>; Juan Wu <sup>a,b</sup>; Qian Long <sup>b,c</sup>; Yuan Luo <sup>a,b</sup>; Xulin Li <sup>a,b</sup>;  
Lijuan Huang <sup>b,c</sup>; Lingpu Jia <sup>b,d</sup>; Huiming Li <sup>a</sup>; Kunping Liu <sup>b,c\*</sup>

<sup>a</sup> School of Food and Biological Engineering, Chengdu University, Chengdu, 610106, China

<sup>b</sup> Antibiotics Research and Re-Evaluation Key Laboratory of Sichuan Province, Sichuan Industrial Institute of Antibiotics, School of Pharmacy, Chengdu University, Chengdu, 610106, China

<sup>c</sup> Key Laboratory of Medicinal and Edible Plants Resources Development of Sichuan Education Department, Sichuan Industrial Institute of Antibiotics, School of Pharmacy, Chengdu University, Chengdu, 610106, China

<sup>d</sup> Institute for Advanced Study, Chengdu University, Chengdu, 610106, China

\* Corresponding author. *E-mail addresses*: liaowenlong@cdu.edu.cn (W. Liao), liukunping@cdu.edu.cn (K. Liu).

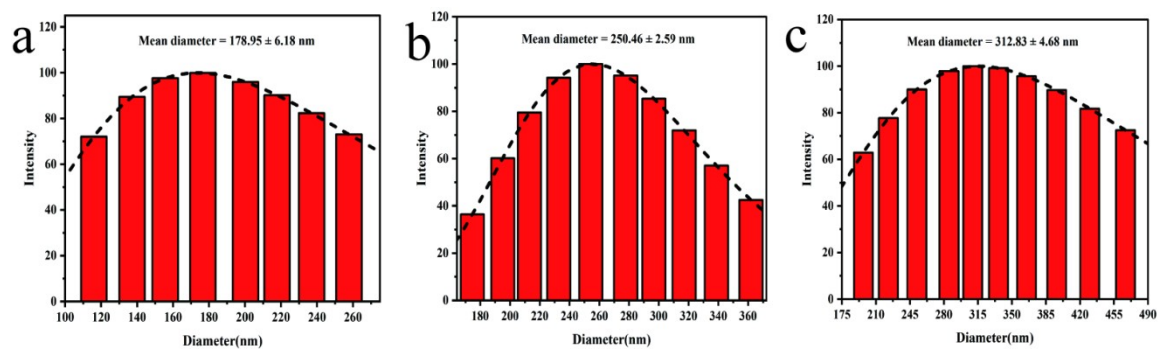

**Fig. S1** The particle size distribution of (a) Fe<sub>3</sub>O<sub>4</sub>, (b) Fe<sub>3</sub>O<sub>4</sub>@TiO<sub>2</sub>@NOR, and (c)

MIFTA

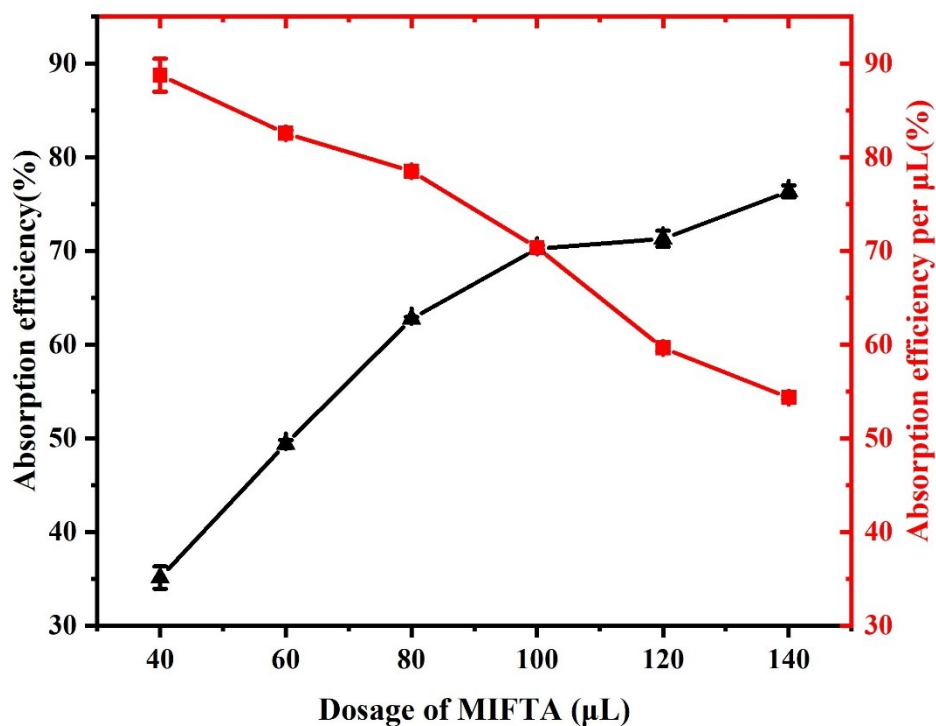

**Fig. S2** Effect of MIFTA dosage on the adsorption efficiency

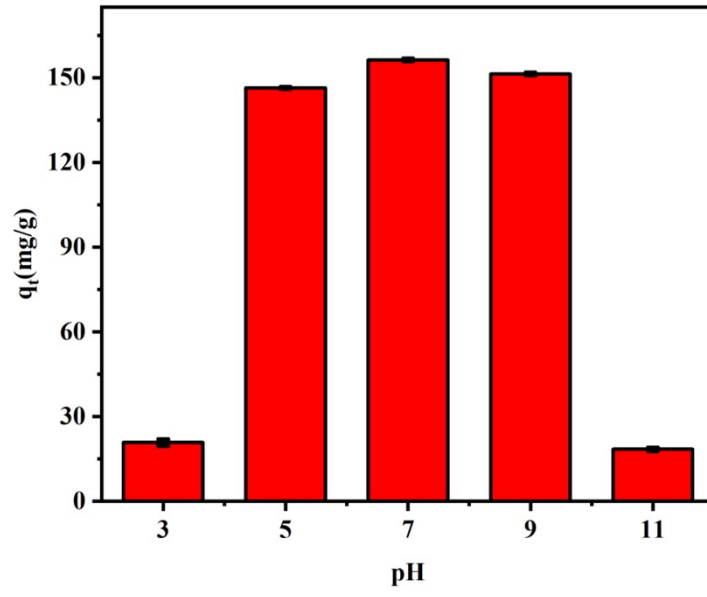

**Fig. S3** The effect of solution pH on adsorption efficiency

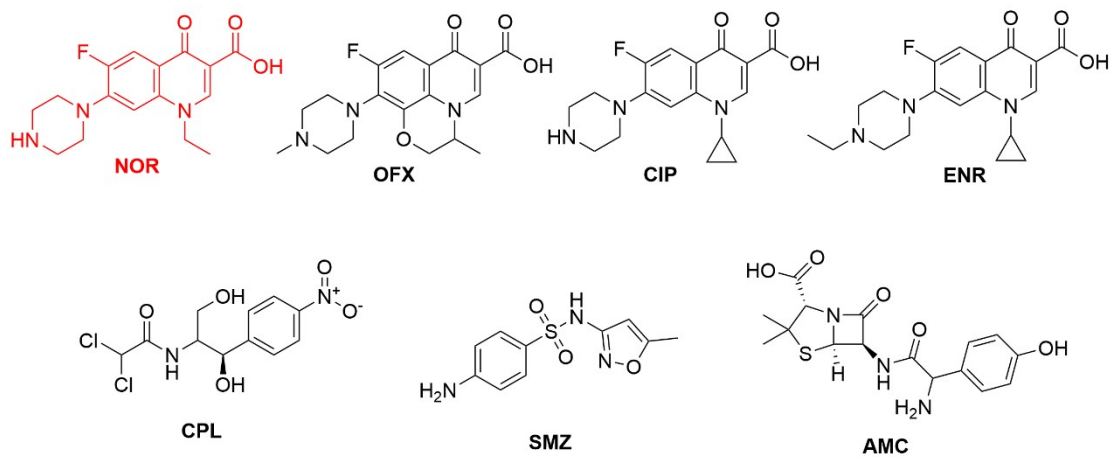

**Fig. S4** The chemical structures of NOR and competitive compounds

**Table S1** The adsorption parameters and constants of NOR by MIFTA.

| Adsorption models   | parameters / constant          | R <sup>2</sup> |
|---------------------|--------------------------------|----------------|
| Pseudo-First-Order  | $k_1=0.009$ $q_e= 88.3$ mg/g   | 0.560          |
| Pseudo-Second-Order | $k_2=0.007$ $q_e= 146.0$ mg/g  | 0.999          |
| Langmuir            | $K_L=0.053$ $q_m = 390.6$ mg/g | 0.975          |
| Freundlich          | $K_F=26.8$ $1/n = 0.703$       | 0.960          |
